# Supplementary material
Source: bioRxiv or medRxiv preprint supplement (https://www.biorxiv.org/highwire/filestream/51984/field_highwire_adjunct_files/1/173823-10.pdf)

# Distributions of DISCO F statistic in real and permuted scenarios

Abundance vector type: functional

Abundance vector type: taxonomic

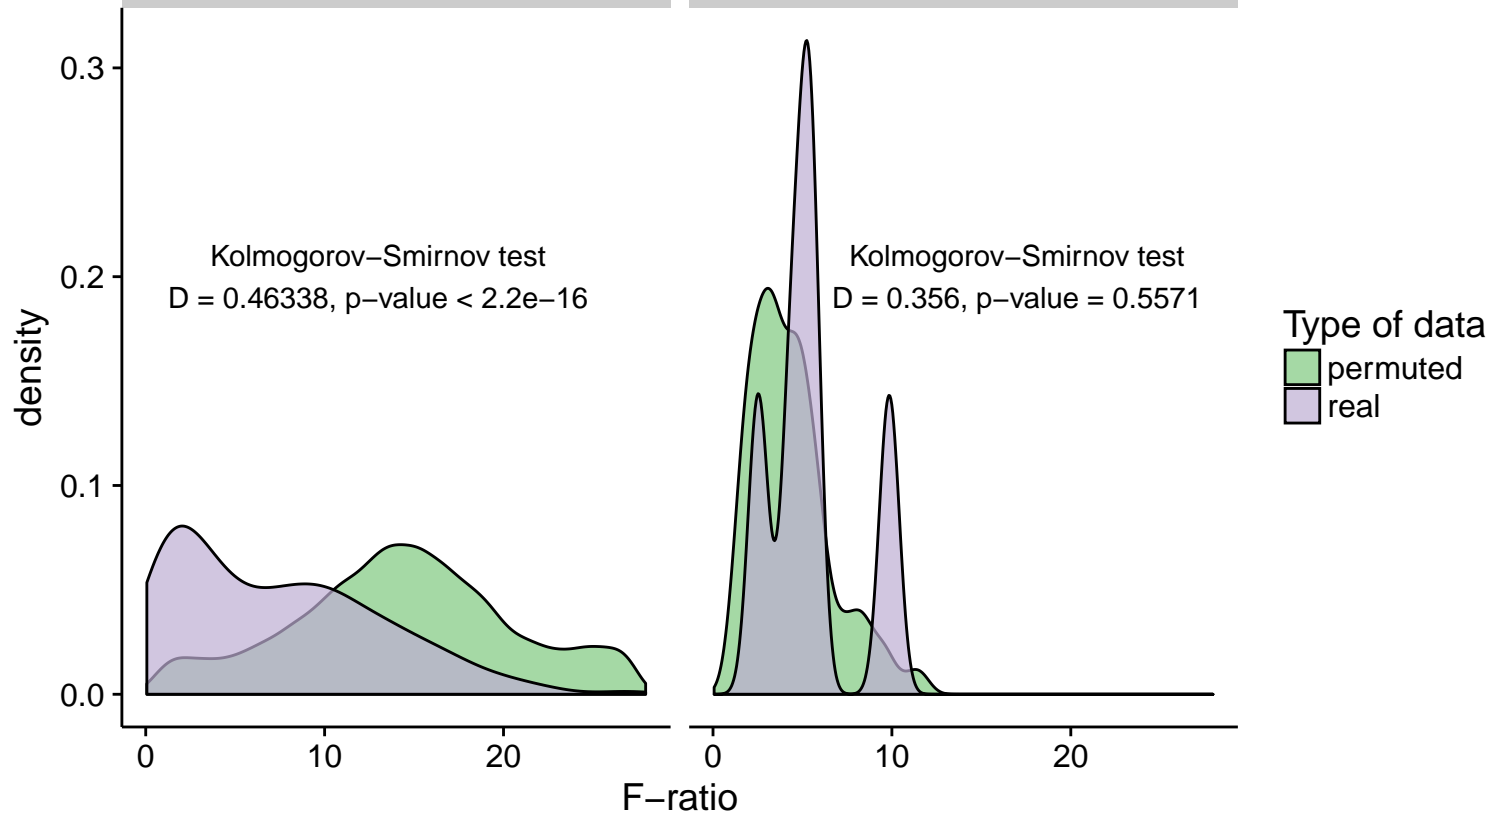

Supplement: Supplementary file [file 173823-10.pdf]
